# Supplementary material
Source: Research Square preprint supplement (doi:10.21203/rs.3.rs-8981720/v1)
Supplement: Supplementary file 1 [file 6bc0f5aca3b066eb8e8e2f19.xlsx]

## Sheet: Sheet1
country	iso3c	year	CO2_pc	GDP_pc	Voice_Accountability	Pol_Stability	Gov_Effectiveness	Reg_Quality	Rule_of_Law	Control_of_Corr	EGI_mean	Urban	Trade	Industry
Ethiopia	ETH	1996	45.7756	262.725	-1.08355	-1.05474	-1.20759	-1.29678	-0.965789	-0.930546	-1.08983	14.006	22.4	9.54553
Ethiopia	ETH	1997	52.4587	262.411	-1.0364	-0.843505	-1.19916	-1.28157	-0.937233	-0.916875	-1.03579	14.186	22.8	11.9051
Ethiopia	ETH	1998	62.0008	245.504	-0.989251	-0.632267	-1.19073	-1.26636	-0.908677	-0.903204	-0.981748	14.369	23	11.2887
Ethiopia	ETH	1999	59.9012	250.236	-1.01049	-0.789149	-1.19861	-1.2913	-0.946198	-0.904981	-1.02346	14.553	23	11.8979
Ethiopia	ETH	2000	77.302	257.413	-1.03174	-0.946032	-1.2065	-1.31623	-0.983719	-0.906757	-1.06516	14.74	23.4	11.4105
Ethiopia	ETH	2001	118.974	270.451	-1.12894	-1.08594	-1.12545	-1.27451	-0.971512	-0.812333	-1.06645	14.927	23.7	11.9279
Ethiopia	ETH	2002	125.095	266.317	-1.22613	-1.22585	-1.04439	-1.23278	-0.959304	-0.717909	-1.06773	15.118	23.9	12.7403
Ethiopia	ETH	2003	140.593	252.807	-1.11473	-1.4096	-1.07023	-1.15583	-0.834281	-0.777412	-1.06035	15.31	24.1	12.8995
Ethiopia	ETH	2004	162.115	278.648	-1.18099	-1.31249	-0.878723	-0.991615	-0.893446	-0.757493	-1.00246	15.504	24.3	12.6855
Ethiopia	ETH	2005	150.281	302.475	-1.23876	-1.69038	-0.917718	-1.11571	-0.938897	-0.772508	-1.11233	15.7	24.5	11.7888
Ethiopia	ETH	2006	164.988	325.543	-1.19372	-1.74013	-0.69058	-1.02832	-0.667516	-0.650105	-0.995061	15.899	24.7	11.5923
Ethiopia	ETH	2007	190.403	352.361	-1.2037	-1.80641	-0.471749	-0.982685	-0.659463	-0.632186	-0.959366	16.116	24.9	11.5895
Ethiopia	ETH	2008	213.897	379.238	-1.30721	-1.73212	-0.45021	-0.899132	-0.706701	-0.6664	-0.960296	16.51	25.1	10.2069
Ethiopia	ETH	2009	215.896	401.069	-1.29825	-1.64107	-0.562429	-0.931927	-0.832282	-0.704722	-0.995113	16.91	25.3	9.68348
Ethiopia	ETH	2010	214.556	438.787	-1.34486	-1.6351	-0.488995	-0.848106	-0.807519	-0.694109	-0.969781	17.319	25.5	9.43513
Ethiopia	ETH	2011	264.082	474.159	-1.36264	-1.50696	-0.521042	-0.994923	-0.741804	-0.667877	-0.965876	17.735	48.2329	9.66464
Ethiopia	ETH	2012	311.088	500.919	-1.30891	-1.56427	-0.45418	-1.05004	-0.677318	-0.608587	-0.943884	18.16	45.3979	9.47614
Ethiopia	ETH	2013	377.663	539.072	-1.31313	-1.40731	-0.620984	-1.13567	-0.649659	-0.50171	-0.938077	18.575	41.4718	10.9446
Ethiopia	ETH	2014	467.431	578.633	-1.28456	-1.33939	-0.443245	-1.07841	-0.468584	-0.448166	-0.843726	18.998	40.7411	13.4713
Ethiopia	ETH	2015	517.977	621.846	-1.29831	-1.49694	-0.712038	-1.05797	-0.527202	-0.476118	-0.928095	19.428	39.6561	16.2978
Ethiopia	ETH	2016	633.342	662.327	-1.40238	-1.61725	-0.714295	-1.1096	-0.507819	-0.442087	-0.965572	19.866	34.899	21.9326
Ethiopia	ETH	2017	625.895	706.164	-1.43262	-1.67723	-0.759255	-1.0298	-0.46982	-0.582322	-0.991841	20.31	31.1036	23.5819
Ethiopia	ETH	2018	698.92	734.228	-1.16189	-1.27461	-0.666894	-0.984722	-0.444718	-0.505318	-0.839692	20.763	31.1994	27.3057
Ethiopia	ETH	2019	761.324	774.512	-1.06249	-1.30376	-0.661421	-0.910632	-0.482023	-0.434499	-0.809138	21.225	28.8153	24.8224
Ethiopia	ETH	2020	672.032	799.476	-1.03639	-1.7537	-0.589583	-0.975501	-0.402889	-0.389672	-0.857957	21.695	24.0061	23.1023
Ethiopia	ETH	2021	690.316	822.306	-1.0711	-2.18383	-0.650383	-0.941966	-0.623266	-0.422022	-0.982094	22.174	24.3451	21.85
Ethiopia	ETH	2022	656.557	843.648	-1.04841	-2.07061	-0.791824	-0.948417	-0.635894	-0.433259	-0.988069	22.661	26.5955	22.7175
Ethiopia	ETH	2023	664.27	876.169	-1.06067	-1.96957	-0.768662	-1.02108	-0.670203	-0.465062	-0.99254	23.157	20.5982	24.4837
